# Supplementary material
Source: Springer Nature journal article supplement (https://www.springermedizin.de/resource/supplementary/12865_2008_193_MOESM4_ESM.pdf/9428710)

### A Proliferation of OT-I CD8+ T cells

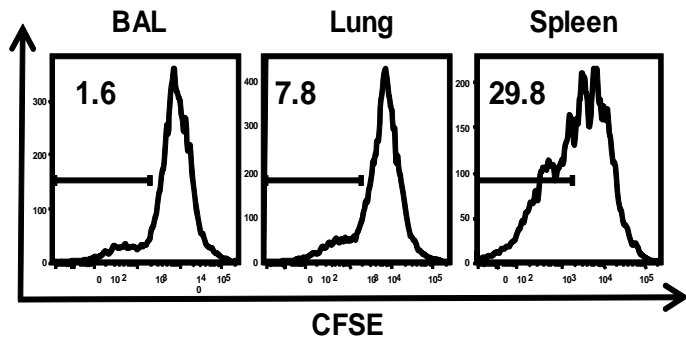

### % proliferation of OT-I CD8+ T cells

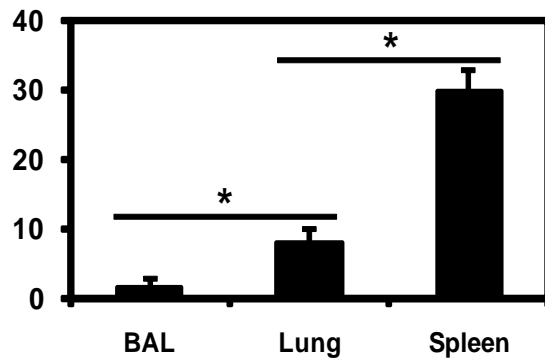

### B Proliferation of OT-II CD4+ T cells

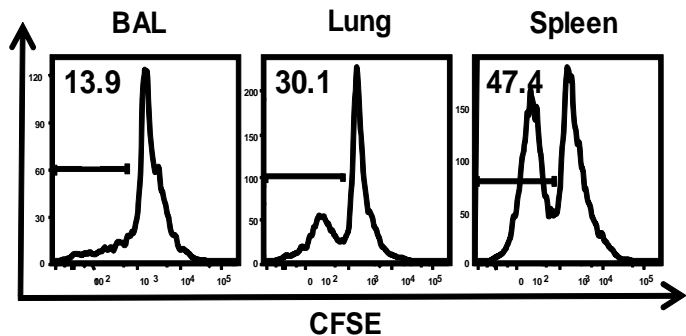

### % proliferation of OT-II CD4+ T cells

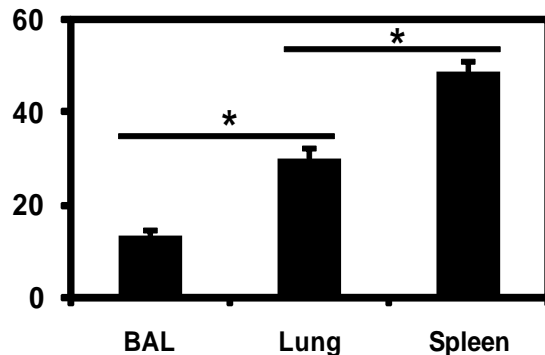

Supplement: MOESM4 [file 9428710]
